# Supplementary material for: The influence of ICT access and use on 6th grade mathematics achievement in Latin America and the Caribbean
Source: Research Square preprint supplement (doi:10.21203/rs.3.rs-7707665/v1), 2025-11-04
Supplement: Supplementary file 1 [file b0165138a98c387192d58543.xlsx]

## Sheet: Sheet1
Country		Valid		Missing
		N	Percent	N	Percent
Argentina	Availability of own computer in classroom	4417	0.883	587	0.117
	Math plausible value 1	5004	1	0	0
	Math plausible value 2	5004	1	0	0
	Math plausible value 3	5004	1	0	0
	Math plausible value 4	5004	1	0	0
	Math plausible value 5	5004	1	0	0
	Gender	5004	1	0	0
	Type of school	5004	1	0	0
	School location	5004	1	0	0
	Support for students learning in math	4568	0.913	436	0.087
	Mathematics class organization	4554	0.91	450	0.09
	Family socioeconomic index	4689	0.937	315	0.063
	Indigenous	3893	0.778	1111	0.222
	Immigrant	4339	0.867	665	0.133
	Disruption in math classes	4285	0.856	719	0.144
	Math self-efficacy	4229	0.845	775	0.155
	Lack of teacher’s preparation in ICT	4878	0.975	126	0.025
	School's socioeconomic environment	4898	0.979	106	0.021
	Insufficient Internet access	4906	0.98	98	0.02
	Insufficient computational programs for learning	4867	0.973	137	0.027
	Lack of mobile computational lab	4822	0.964	182	0.036
	Lack of Internet at home	3438	0.687	1566	0.313
	Parental expectation of educational achievement	3960	0.791	1044	0.209
	Lack of a computer for the student at home	3947	0.789	1057	0.211
	Computer use for homework	2311	0.462	2693	0.538
	Computer use for playing games	2201	0.44	2803	0.56
	Computer use for email or chat	2113	0.422	2891	0.578
	Computer use for social media	2133	0.426	2871	0.574
	Computer use for information search	2289	0.457	2715	0.543
	Computer use for playing videos and music	2248	0.449	2756	0.551
	Parental involvement in learning at home	3955	0.79	1049	0.21
Brasil	Availability of own computer in classroom	3945	0.907	404	0.093
	Math plausible value 1	4349	1	0	0
	Math plausible value 2	4349	1	0	0
	Math plausible value 3	4349	1	0	0
	Math plausible value 4	4349	1	0	0
	Math plausible value 5	4349	1	0	0
	Gender	4348	1	1	0
	Type of school	4349	1	0	0
	School location	4349	1	0	0
	Support for students learning in math	4039	0.929	310	0.071
	Mathematics class organization	4042	0.929	307	0.071
	Family socioeconomic index	4145	0.953	204	0.047
	Indigenous	3899	0.897	450	0.103
	Immigrant	3826	0.88	523	0.12
	Disruption in math classes	3774	0.868	575	0.132
	Math self-efficacy	3776	0.868	573	0.132
	Lack of teacher’s preparation in ICT	4279	0.984	70	0.016
	School's socioeconomic environment	4349	1	0	0
	Insufficient Internet access	4323	0.994	26	0.006
	Insufficient computational programs for learning	4349	1	0	0
	Lack of mobile computational lab	4349	1	0	0
	Lack of Internet at home	3175	0.73	1174	0.27
	Parental expectation of educational achievement	3577	0.822	772	0.178
	Lack of a computer for the student at home	3552	0.817	797	0.183
	Computer use for homework	1720	0.395	2629	0.605
	Computer use for playing games	1640	0.377	2709	0.623
	Computer use for email or chat	1600	0.368	2749	0.632
	Computer use for social media	1600	0.368	2749	0.632
	Computer use for information search	1655	0.381	2694	0.619
	Computer use for playing videos and music	1644	0.378	2705	0.622
	Parental involvement in learning at home	3502	0.805	847	0.195
Colombia	Availability of own computer in classroom	4167	0.933	300	0.067
	Math plausible value 1	4467	1	0	0
	Math plausible value 2	4467	1	0	0
	Math plausible value 3	4467	1	0	0
	Math plausible value 4	4467	1	0	0
	Math plausible value 5	4467	1	0	0
	Gender	4467	1	0	0
	Type of school	4467	1	0	0
	School location	4467	1	0	0
	Support for students learning in math	4338	0.971	129	0.029
	Mathematics class organization	4329	0.969	138	0.031
	Family socioeconomic index	4453	0.997	14	0.003
	Indigenous	4004	0.896	463	0.104
	Immigrant	4151	0.929	316	0.071
	Disruption in math classes	4126	0.924	341	0.076
	Math self-efficacy	4051	0.907	416	0.093
	Lack of teacher’s preparation in ICT	4057	0.908	410	0.092
	School's socioeconomic environment	4130	0.925	337	0.075
	Insufficient Internet access	4074	0.912	393	0.088
	Insufficient computational programs for learning	4033	0.903	434	0.097
	Lack of mobile computational lab	3927	0.879	540	0.121
	Lack of Internet at home	3495	0.782	972	0.218
	Parental expectation of educational achievement	4265	0.955	202	0.045
	Lack of a computer for the student at home	4229	0.947	238	0.053
	Computer use for homework	2236	0.501	2231	0.499
	Computer use for playing games	1987	0.445	2480	0.555
	Computer use for email or chat	1958	0.438	2509	0.562
	Computer use for social media	1954	0.437	2513	0.563
	Computer use for information search	2030	0.454	2437	0.546
	Computer use for playing videos and music	2010	0.45	2457	0.55
	Parental involvement in learning at home	4112	0.921	355	0.079
Costa Rica	Availability of own computer in classroom	3497	0.945	202	0.055
	Math plausible value 1	3699	1	0	0
	Math plausible value 2	3699	1	0	0
	Math plausible value 3	3699	1	0	0
	Math plausible value 4	3699	1	0	0
	Math plausible value 5	3699	1	0	0
	Gender	3699	1	0	0
	Type of school	3699	1	0	0
	School location	3699	1	0	0
	Support for students learning in math	3607	0.975	92	0.025
	Mathematics class organization	3609	0.976	90	0.024
	Family socioeconomic index	3678	0.994	21	0.006
	Indigenous	3423	0.925	276	0.075
	Immigrant	3430	0.927	269	0.073
	Disruption in math classes	3485	0.942	214	0.058
	Math self-efficacy	3439	0.93	260	0.07
	Lack of teacher’s preparation in ICT	3507	0.948	192	0.052
	School's socioeconomic environment	3614	0.977	85	0.023
	Insufficient Internet access	3554	0.961	145	0.039
	Insufficient computational programs for learning	3583	0.969	116	0.031
	Lack of mobile computational lab	3470	0.938	229	0.062
	Lack of Internet at home	3089	0.835	610	0.165
	Parental expectation of educational achievement	3542	0.958	157	0.042
	Lack of a computer for the student at home	3530	0.954	169	0.046
	Computer use for homework	1943	0.525	1756	0.475
	Computer use for playing games	1787	0.483	1912	0.517
	Computer use for email or chat	1749	0.473	1950	0.527
	Computer use for social media	1746	0.472	1953	0.528
	Computer use for information search	1870	0.506	1829	0.494
	Computer use for playing videos and music	1832	0.495	1867	0.505
	Parental involvement in learning at home	3526	0.953	173	0.047
Cuba	Availability of own computer in classroom	4917	0.959	209	0.041
	Math plausible value 1	5126	1	0	0
	Math plausible value 2	5126	1	0	0
	Math plausible value 3	5126	1	0	0
	Math plausible value 4	5126	1	0	0
	Math plausible value 5	5126	1	0	0
	Gender	5100	0.995	26	0.005
	Type of school	5126	1	0	0
	School location	5126	1	0	0
	Support for students learning in math	5057	0.987	69	0.013
	Mathematics class organization	5047	0.985	79	0.015
	Family socioeconomic index	5124	1	2	0
	Indigenous	0	0	5126	1
	Immigrant	4971	0.97	155	0.03
	Disruption in math classes	4846	0.945	280	0.055
	Math self-efficacy	4709	0.919	417	0.081
	Lack of teacher’s preparation in ICT	5013	0.978	113	0.022
	School's socioeconomic environment	5111	0.997	15	0.003
	Insufficient Internet access	5046	0.984	80	0.016
	Insufficient computational programs for learning	5031	0.981	95	0.019
	Lack of mobile computational lab	5126	1	0	0
	Lack of Internet at home	2713	0.529	2413	0.471
	Parental expectation of educational achievement	5013	0.978	113	0.022
	Lack of a computer for the student at home	4815	0.939	311	0.061
	Computer use for homework	1936	0.378	3190	0.622
	Computer use for playing games	1798	0.351	3328	0.649
	Computer use for email or chat	1464	0.286	3662	0.714
	Computer use for social media	1474	0.288	3652	0.712
	Computer use for information search	1520	0.297	3606	0.703
	Computer use for playing videos and music	1773	0.346	3353	0.654
	Parental involvement in learning at home	4978	0.971	148	0.029
República Dominicana	Availability of own computer in classroom	3888	0.794	1011	0.206
	Math plausible value 1	4899	1	0	0
	Math plausible value 2	4899	1	0	0
	Math plausible value 3	4899	1	0	0
	Math plausible value 4	4899	1	0	0
	Math plausible value 5	4899	1	0	0
	Gender	4884	0.997	15	0.003
	Type of school	4899	1	0	0
	School location	4899	1	0	0
	Support for students learning in math	4591	0.937	308	0.063
	Mathematics class organization	4530	0.925	369	0.075
	Family socioeconomic index	4876	0.995	23	0.005
	Indigenous	0	0	4899	1
	Immigrant	4514	0.921	385	0.079
	Disruption in math classes	3791	0.774	1108	0.226
	Math self-efficacy	3660	0.747	1239	0.253
	Lack of teacher’s preparation in ICT	4695	0.958	204	0.042
	School's socioeconomic environment	4792	0.978	107	0.022
	Insufficient Internet access	4634	0.946	265	0.054
	Insufficient computational programs for learning	4689	0.957	210	0.043
	Lack of mobile computational lab	4631	0.945	268	0.055
	Lack of Internet at home	3345	0.683	1554	0.317
	Parental expectation of educational achievement	4559	0.931	340	0.069
	Lack of a computer for the student at home	4487	0.916	412	0.084
	Computer use for homework	1868	0.381	3031	0.619
	Computer use for playing games	1292	0.264	3607	0.736
	Computer use for email or chat	1209	0.247	3690	0.753
	Computer use for social media	1241	0.253	3658	0.747
	Computer use for information search	1403	0.286	3496	0.714
	Computer use for playing videos and music	1316	0.269	3583	0.731
	Parental involvement in learning at home	4374	0.893	525	0.107
Ecuador	Availability of own computer in classroom	6287	0.93	471	0.07
	Math plausible value 1	6758	1	0	0
	Math plausible value 2	6758	1	0	0
	Math plausible value 3	6758	1	0	0
	Math plausible value 4	6758	1	0	0
	Math plausible value 5	6758	1	0	0
	Gender	6758	1	0	0
	Type of school	6758	1	0	0
	School location	6758	1	0	0
	Support for students learning in math	6567	0.972	191	0.028
	Mathematics class organization	6563	0.971	195	0.029
	Family socioeconomic index	6677	0.988	81	0.012
	Indigenous	5627	0.833	1131	0.167
	Immigrant	5843	0.865	915	0.135
	Disruption in math classes	6222	0.921	536	0.079
	Math self-efficacy	6103	0.903	655	0.097
	Lack of teacher’s preparation in ICT	6369	0.942	389	0.058
	School's socioeconomic environment	6652	0.984	106	0.016
	Insufficient Internet access	6567	0.972	191	0.028
	Insufficient computational programs for learning	6576	0.973	182	0.027
	Lack of mobile computational lab	6500	0.962	258	0.038
	Lack of Internet at home	4904	0.726	1854	0.274
	Parental expectation of educational achievement	6274	0.928	484	0.072
	Lack of a computer for the student at home	6192	0.916	566	0.084
	Computer use for homework	3502	0.518	3256	0.482
	Computer use for playing games	2957	0.438	3801	0.562
	Computer use for email or chat	2846	0.421	3912	0.579
	Computer use for social media	2890	0.428	3868	0.572
	Computer use for information search	3201	0.474	3557	0.526
	Computer use for playing videos and music	3054	0.452	3704	0.548
	Parental involvement in learning at home	6217	0.92	541	0.08
El Salvador	Availability of own computer in classroom	5320	0.899	600	0.101
	Math plausible value 1	5920	1	0	0
	Math plausible value 2	5920	1	0	0
	Math plausible value 3	5920	1	0	0
	Math plausible value 4	5920	1	0	0
	Math plausible value 5	5920	1	0	0
	Gender	5912	0.999	8	0.001
	Type of school	5920	1	0	0
	School location	5920	1	0	0
	Support for students learning in math	5631	0.951	289	0.049
	Mathematics class organization	5626	0.95	294	0.05
	Family socioeconomic index	5852	0.989	68	0.011
	Indigenous	4945	0.835	975	0.165
	Immigrant	5212	0.88	708	0.12
	Disruption in math classes	5214	0.881	706	0.119
	Math self-efficacy	5133	0.867	787	0.133
	Lack of teacher’s preparation in ICT	5731	0.968	189	0.032
	School's socioeconomic environment	5813	0.982	107	0.018
	Insufficient Internet access	5805	0.981	115	0.019
	Insufficient computational programs for learning	5798	0.979	122	0.021
	Lack of mobile computational lab	5773	0.975	147	0.025
	Lack of Internet at home	3644	0.616	2276	0.384
	Parental expectation of educational achievement	5401	0.912	519	0.088
	Lack of a computer for the student at home	5234	0.884	686	0.116
	Computer use for homework	1927	0.326	3993	0.674
	Computer use for playing games	1393	0.235	4527	0.765
	Computer use for email or chat	1323	0.223	4597	0.777
	Computer use for social media	1327	0.224	4593	0.776
	Computer use for information search	1548	0.261	4372	0.739
	Computer use for playing videos and music	1405	0.237	4515	0.763
	Parental involvement in learning at home	5239	0.885	681	0.115
Guatemala	Availability of own computer in classroom	4319	0.882	576	0.118
	Math plausible value 1	4895	1	0	0
	Math plausible value 2	4895	1	0	0
	Math plausible value 3	4895	1	0	0
	Math plausible value 4	4895	1	0	0
	Math plausible value 5	4895	1	0	0
	Gender	4895	1	0	0
	Type of school	4895	1	0	0
	School location	4895	1	0	0
	Support for students learning in math	4659	0.952	236	0.048
	Mathematics class organization	4624	0.945	271	0.055
	Family socioeconomic index	4831	0.987	64	0.013
	Indigenous	3295	0.673	1600	0.327
	Immigrant	4195	0.857	700	0.143
	Disruption in math classes	4329	0.884	566	0.116
	Math self-efficacy	4219	0.862	676	0.138
	Lack of teacher’s preparation in ICT	4702	0.961	193	0.039
	School's socioeconomic environment	4866	0.994	29	0.006
	Insufficient Internet access	4390	0.897	505	0.103
	Insufficient computational programs for learning	4675	0.955	220	0.045
	Lack of mobile computational lab	4717	0.964	178	0.036
	Lack of Internet at home	3300	0.674	1595	0.326
	Parental expectation of educational achievement	4676	0.955	219	0.045
	Lack of a computer for the student at home	4558	0.931	337	0.069
	Computer use for homework	2197	0.449	2698	0.551
	Computer use for playing games	1806	0.369	3089	0.631
	Computer use for email or chat	1761	0.36	3134	0.64
	Computer use for social media	1753	0.358	3142	0.642
	Computer use for information search	1828	0.373	3067	0.627
	Computer use for playing videos and music	1804	0.369	3091	0.631
	Parental involvement in learning at home	4299	0.878	596	0.122
Honduras	Availability of own computer in classroom	3628	0.82	795	0.18
	Math plausible value 1	4423	1	0	0
	Math plausible value 2	4423	1	0	0
	Math plausible value 3	4423	1	0	0
	Math plausible value 4	4423	1	0	0
	Math plausible value 5	4423	1	0	0
	Gender	4422	1	1	0
	Type of school	4423	1	0	0
	School location	4423	1	0	0
	Support for students learning in math	4082	0.923	341	0.077
	Mathematics class organization	4052	0.916	371	0.084
	Family socioeconomic index	4281	0.968	142	0.032
	Indigenous	2634	0.596	1789	0.404
	Immigrant	3679	0.832	744	0.168
	Disruption in math classes	3558	0.804	865	0.196
	Math self-efficacy	3454	0.781	969	0.219
	Lack of teacher’s preparation in ICT	4169	0.943	254	0.057
	School's socioeconomic environment	4375	0.989	48	0.011
	Insufficient Internet access	4243	0.959	180	0.041
	Insufficient computational programs for learning	4248	0.96	175	0.04
	Lack of mobile computational lab	4203	0.95	220	0.05
	Lack of Internet at home	2317	0.524	2106	0.476
	Parental expectation of educational achievement	3751	0.848	672	0.152
	Lack of a computer for the student at home	3589	0.811	834	0.189
	Computer use for homework	1452	0.328	2971	0.672
	Computer use for playing games	1044	0.236	3379	0.764
	Computer use for email or chat	992	0.224	3431	0.776
	Computer use for social media	994	0.225	3429	0.775
	Computer use for information search	1095	0.248	3328	0.752
	Computer use for playing videos and music	1047	0.237	3376	0.763
	Parental involvement in learning at home	3431	0.776	992	0.224
México	Availability of own computer in classroom	4496	0.932	328	0.068
	Math plausible value 1	4824	1	0	0
	Math plausible value 2	4824	1	0	0
	Math plausible value 3	4824	1	0	0
	Math plausible value 4	4824	1	0	0
	Math plausible value 5	4824	1	0	0
	Gender	4824	1	0	0
	Type of school	4824	1	0	0
	School location	4824	1	0	0
	Support for students learning in math	4554	0.944	270	0.056
	Mathematics class organization	4522	0.937	302	0.063
	Family socioeconomic index	4583	0.95	241	0.05
	Indigenous	4227	0.876	597	0.124
	Immigrant	4145	0.859	679	0.141
	Disruption in math classes	4478	0.928	346	0.072
	Math self-efficacy	4442	0.921	382	0.079
	Lack of teacher’s preparation in ICT	4749	0.984	75	0.016
	School's socioeconomic environment	4824	1	0	0
	Insufficient Internet access	4776	0.99	48	0.01
	Insufficient computational programs for learning	4794	0.994	30	0.006
	Lack of mobile computational lab	4776	0.99	48	0.01
	Lack of Internet at home	3570	0.74	1254	0.26
	Parental expectation of educational achievement	4212	0.873	612	0.127
	Lack of a computer for the student at home	4151	0.86	673	0.14
	Computer use for homework	1696	0.352	3128	0.648
	Computer use for playing games	1608	0.333	3216	0.667
	Computer use for email or chat	1588	0.329	3236	0.671
	Computer use for social media	1589	0.329	3235	0.671
	Computer use for information search	1656	0.343	3168	0.657
	Computer use for playing videos and music	1628	0.337	3196	0.663
	Parental involvement in learning at home	4184	0.867	640	0.133
Nicaragua	Availability of own computer in classroom	3855	0.792	1013	0.208
	Math plausible value 1	4868	1	0	0
	Math plausible value 2	4868	1	0	0
	Math plausible value 3	4868	1	0	0
	Math plausible value 4	4868	1	0	0
	Math plausible value 5	4868	1	0	0
	Gender	4868	1	0	0
	Type of school	4868	1	0	0
	School location	4868	1	0	0
	Support for students learning in math	4450	0.914	418	0.086
	Mathematics class organization	4404	0.905	464	0.095
	Family socioeconomic index	4623	0.95	245	0.05
	Indigenous	3647	0.749	1221	0.251
	Immigrant	4045	0.831	823	0.169
	Disruption in math classes	3856	0.792	1012	0.208
	Math self-efficacy	3742	0.769	1126	0.231
	Lack of teacher’s preparation in ICT	4494	0.923	374	0.077
	School's socioeconomic environment	4793	0.985	75	0.015
	Insufficient Internet access	4551	0.935	317	0.065
	Insufficient computational programs for learning	4548	0.934	320	0.066
	Lack of mobile computational lab	4495	0.923	373	0.077
	Lack of Internet at home	2554	0.525	2314	0.475
	Parental expectation of educational achievement	4324	0.888	544	0.112
	Lack of a computer for the student at home	4193	0.861	675	0.139
	Computer use for homework	1616	0.332	3252	0.668
	Computer use for playing games	1198	0.246	3670	0.754
	Computer use for email or chat	1133	0.233	3735	0.767
	Computer use for social media	1143	0.235	3725	0.765
	Computer use for information search	1227	0.252	3641	0.748
	Computer use for playing videos and music	1183	0.243	3685	0.757
	Parental involvement in learning at home	3981	0.818	887	0.182
Panama	Availability of own computer in classroom	4650	0.826	982	0.174
	Math plausible value 1	5632	1	0	0
	Math plausible value 2	5632	1	0	0
	Math plausible value 3	5632	1	0	0
	Math plausible value 4	5632	1	0	0
	Math plausible value 5	5632	1	0	0
	Gender	5624	0.999	8	0.001
	Type of school	5632	1	0	0
	School location	5632	1	0	0
	Support for students learning in math	5118	0.909	514	0.091
	Mathematics class organization	5065	0.899	567	0.101
	Family socioeconomic index	5361	0.952	271	0.048
	Indigenous	4423	0.785	1209	0.215
	Immigrant	4671	0.829	961	0.171
	Disruption in math classes	4627	0.822	1005	0.178
	Math self-efficacy	4527	0.804	1105	0.196
	Lack of teacher’s preparation in ICT	4943	0.878	689	0.122
	School's socioeconomic environment	5056	0.898	576	0.102
	Insufficient Internet access	5033	0.894	599	0.106
	Insufficient computational programs for learning	4975	0.883	657	0.117
	Lack of mobile computational lab	4715	0.837	917	0.163
	Lack of Internet at home	3065	0.544	2567	0.456
	Parental expectation of educational achievement	4481	0.796	1151	0.204
	Lack of a computer for the student at home	4387	0.779	1245	0.221
	Computer use for homework	2155	0.383	3477	0.617
	Computer use for playing games	1698	0.301	3934	0.699
	Computer use for email or chat	1645	0.292	3987	0.708
	Computer use for social media	1648	0.293	3984	0.707
	Computer use for information search	1869	0.332	3763	0.668
	Computer use for playing videos and music	1723	0.306	3909	0.694
	Parental involvement in learning at home	4370	0.776	1262	0.224
PERU	Availability of own computer in classroom	5697	0.959	241	0.041
	Math plausible value 1	5938	1	0	0
	Math plausible value 2	5938	1	0	0
	Math plausible value 3	5938	1	0	0
	Math plausible value 4	5938	1	0	0
	Math plausible value 5	5938	1	0	0
	Gender	5938	1	0	0
	Type of school	5938	1	0	0
	School location	5938	1	0	0
	Support for students learning in math	5786	0.974	152	0.026
	Mathematics class organization	5757	0.97	181	0.03
	Family socioeconomic index	5800	0.977	138	0.023
	Indigenous	5177	0.872	761	0.128
	Immigrant	5453	0.918	485	0.082
	Disruption in math classes	5598	0.943	340	0.057
	Math self-efficacy	5589	0.941	349	0.059
	Lack of teacher’s preparation in ICT	5879	0.99	59	0.01
	School's socioeconomic environment	5846	0.985	92	0.015
	Insufficient Internet access	5780	0.973	158	0.027
	Insufficient computational programs for learning	5767	0.971	171	0.029
	Lack of mobile computational lab	5809	0.978	129	0.022
	Lack of Internet at home	4431	0.746	1507	0.254
	Parental expectation of educational achievement	5184	0.873	754	0.127
	Lack of a computer for the student at home	5105	0.86	833	0.14
	Computer use for homework	2638	0.444	3300	0.556
	Computer use for playing games	2473	0.416	3465	0.584
	Computer use for email or chat	2419	0.407	3519	0.593
	Computer use for social media	2417	0.407	3521	0.593
	Computer use for information search	2524	0.425	3414	0.575
	Computer use for playing videos and music	2482	0.418	3456	0.582
	Parental involvement in learning at home	5153	0.868	785	0.132
PARAGUAY	Availability of own computer in classroom	4229	0.872	620	0.128
	Math plausible value 1	4849	1	0	0
	Math plausible value 2	4849	1	0	0
	Math plausible value 3	4849	1	0	0
	Math plausible value 4	4849	1	0	0
	Math plausible value 5	4849	1	0	0
	Gender	4849	1	0	0
	Type of school	4849	1	0	0
	School location	4849	1	0	0
	Support for students learning in math	4535	0.935	314	0.065
	Mathematics class organization	4485	0.925	364	0.075
	Family socioeconomic index	4691	0.967	158	0.033
	Indigenous	3724	0.768	1125	0.232
	Immigrant	3983	0.821	866	0.179
	Disruption in math classes	4113	0.848	736	0.152
	Math self-efficacy	3975	0.82	874	0.18
	Lack of teacher’s preparation in ICT	4656	0.96	193	0.04
	School's socioeconomic environment	4719	0.973	130	0.027
	Insufficient Internet access	4716	0.973	133	0.027
	Insufficient computational programs for learning	4776	0.985	73	0.015
	Lack of mobile computational lab	4667	0.962	182	0.038
	Lack of Internet at home	2868	0.591	1981	0.409
	Parental expectation of educational achievement	4056	0.836	793	0.164
	Lack of a computer for the student at home	3987	0.822	862	0.178
	Computer use for homework	1194	0.246	3655	0.754
	Computer use for playing games	1091	0.225	3758	0.775
	Computer use for email or chat	1036	0.214	3813	0.786
	Computer use for social media	1045	0.216	3804	0.784
	Computer use for information search	1152	0.238	3697	0.762
	Computer use for playing videos and music	1101	0.227	3748	0.773
	Parental involvement in learning at home	3922	0.809	927	0.191
SALVADOR	Availability of own computer in classroom	5320	0.899	600	0.101
	Math plausible value 1	5920	1	0	0
	Math plausible value 2	5920	1	0	0
	Math plausible value 3	5920	1	0	0
	Math plausible value 4	5920	1	0	0
	Math plausible value 5	5920	1	0	0
	Gender	5912	0.999	8	0.001
	Type of school	5920	1	0	0
	School location	5920	1	0	0
	Support for students learning in math	5631	0.951	289	0.049
	Mathematics class organization	5626	0.95	294	0.05
	Family socioeconomic index	5852	0.989	68	0.011
	Indigenous	4945	0.835	975	0.165
	Immigrant	5212	0.88	708	0.12
	Disruption in math classes	5214	0.881	706	0.119
	Math self-efficacy	5133	0.867	787	0.133
	Lack of teacher’s preparation in ICT	5731	0.968	189	0.032
	School's socioeconomic environment	5813	0.982	107	0.018
	Insufficient Internet access	5805	0.981	115	0.019
	Insufficient computational programs for learning	5798	0.979	122	0.021
	Lack of mobile computational lab	5773	0.975	147	0.025
	Lack of Internet at home	3644	0.616	2276	0.384
	Parental expectation of educational achievement	5401	0.912	519	0.088
	Lack of a computer for the student at home	5234	0.884	686	0.116
	Computer use for homework	1927	0.326	3993	0.674
	Computer use for playing games	1393	0.235	4527	0.765
	Computer use for email or chat	1323	0.223	4597	0.777
	Computer use for social media	1327	0.224	4593	0.776
	Computer use for information search	1548	0.261	4372	0.739
	Computer use for playing videos and music	1405	0.237	4515	0.763
	Parental involvement in learning at home	5239	0.885	681	0.115
URUGUAY	Availability of own computer in classroom	4609	0.89	567	0.11
	Math plausible value 1	5176	1	0	0
	Math plausible value 2	5176	1	0	0
	Math plausible value 3	5176	1	0	0
	Math plausible value 4	5176	1	0	0
	Math plausible value 5	5176	1	0	0
	Gender	5176	1	0	0
	Type of school	5176	1	0	0
	School location	5176	1	0	0
	Support for students learning in math	4753	0.918	423	0.082
	Mathematics class organization	4691	0.906	485	0.094
	Family socioeconomic index	4988	0.964	188	0.036
	Indigenous	0	0	5176	1
	Immigrant	4519	0.873	657	0.127
	Disruption in math classes	4461	0.862	715	0.138
	Math self-efficacy	4379	0.846	797	0.154
	Lack of teacher’s preparation in ICT	4901	0.947	275	0.053
	School's socioeconomic environment	4993	0.965	183	0.035
	Insufficient Internet access	4875	0.942	301	0.058
	Insufficient computational programs for learning	4878	0.942	298	0.058
	Lack of mobile computational lab	4844	0.936	332	0.064
	Lack of Internet at home	3815	0.737	1361	0.263
	Parental expectation of educational achievement	4256	0.822	920	0.178
	Lack of a computer for the student at home	4222	0.816	954	0.184
	Computer use for homework	2	0	5174	1
	Computer use for playing games	2	0	5174	1
	Computer use for email or chat	0	0	5176	1
	Computer use for social media	0	0	5176	1
	Computer use for information search	0	0	5176	1
	Computer use for playing videos and music	0	0	5176	1
	Parental involvement in learning at home	4301	0.831	875	0.169
