# Supplementary material for: The influence of ICT access and use on 6th grade mathematics achievement in Latin America and the Caribbean
Source: Research Square preprint supplement (doi:10.21203/rs.3.rs-7707665/v1), 2025-11-04
Supplement: Supplementary file 2 [file b6fc1894cfeb3038976ba78a.xlsx]

## Sheet: Sheet1
Region/country	Variable		weighted				unweighted
		N	Minimum	Maximum	Mean	Std. Deviation	N	Minimum	Maximum	Mean	Std. Deviation
Total region descriptives	Mathematics plausible value 1	9109648	300.3	1110	724.748	102.856	80827	300.3	1110	699.235	99.1295
	Mathematics plausible value 2	9109648	308.1	1133.8	725.748	102.92	80827	308.1	1133.8	700.184	99.3644
	Mathematics plausible value 3	9109648	336	1122.9	726.136	102.122	80827	336	1122.9	700.569	98.6084
	Mathematics plausible value 4	9109648	250	1122	726.049	101.846	80827	250	1122	699.981	98.6758
	Mathematics plausible value 5	9109648	301.5	1123.2	725.701	101.969	80827	301.5	1123.2	700.221	98.6595
	Own computer/table in class	8282118	1	2	1.1878	0.39055	71921	1	2	1.2672	0.44248
	Gender	9107406	1	2	1.5065	0.49996	80768	1	2	1.5007	0.5
	Private school	9109648	1	3	1.1479	0.36464	80827	1	3	1.1893	0.43303
	Rural school	9109648	1	2	1.1966	0.39746	80827	1	2	1.2372	0.4254
	Support for math learning	8568510	-3.08	1.94	-0.163	0.96194	76335	-3.08	1.94	0.01	0.98991
	Socioeconomic status	8765795	-2.68	3.31	0.1384	0.92252	78652	-2.68	3.31	0.0903	0.97299
	Indigenous	7519010	1	2	1.1101	0.31302	52918	1	2	1.1623	0.3687
	Immigrant	7990197	1	2	1.0149	0.1213	70976	1	2	1.0158	0.12479
	Math self-efficacy	8018492	3.25	13	9.6379	2.25268	69427	3.25	13	10.1176	2.20984
	Teachers' ICT skills	8846407	1	4	1.9413	0.87749	77022	1	4	2.0119	0.88728
	School socioeconomic area	8993901	1	4	1.8109	0.72139	78831	1	4	1.8723	0.72322
	Access to computers in school	8886504	1	4	1.8812	1.0346	77351	1	4	2.1232	1.10493
	Access to internet in school	8886042	1	4	1.9861	1.02065	77273	1	4	2.1529	1.08793
	Access to learning software in school	8917994	1	4	1.752	0.89246	77587	1	4	1.9872	1.02161
	Access to computers laboratory in school	8888486	1	2	1.3087	0.46197	76824	1	2	1.3267	0.46901
	Access to internet at home	6512875	1	2	1.6284	0.48323	53723	1	2	1.5789	0.49374
	Parental expectations of learning achivement	7875904	1	6	4.347	1.38621	71531	1	6	4.5339	1.44589
	Own computer at home	7774329	1	2	1.4024	0.49039	70178	1	2	1.428	0.4948
	To do homework	3515401	1	4	2.1939	0.98619	30393	1	4	2.3082	1.01719
	To play games	3221838	1	4	1.9231	1.08458	25975	1	4	1.9054	1.03034
	To write emails or chat	3139066	1	4	1.458	0.8929	24836	1	4	1.3763	0.80762
	To browsing on social media	3140942	1	4	1.6038	1.02066	24954	1	4	1.4546	0.88955
	To search for information	3293217	1	4	2.4473	1.02534	26867	1	4	2.437	1.04068
	To watch videos or listening music	3250514	1	4	2.3614	1.17679	26250	1	4	2.2399	1.12958
	Valid N (listwise)	2076250					13246
Argentina	Mathematics plausible value 1	820043	302.1	1064	689.179	85.9557	5004	302.1	1064	695.833	86.1639
	Mathematics plausible value 2	820043	389.9	1012.7	689.216	87.7146	5004	389.9	1012.7	696.053	88.0128
	Mathematics plausible value 3	820043	372.7	979.6	689.76	86.1939	5004	372.7	979.6	696.407	86.3536
	Mathematics plausible value 4	820043	437.4	1024	690.233	86.4936	5004	437.4	1024	697.045	86.5985
	Mathematics plausible value 5	820043	383.7	994.5	690.354	86.2439	5004	383.7	994.5	696.939	86.3851
	Own computer/table in class	716965	1	2	1.2586	0.43788	4417	1	2	1.2567	0.43688
	Gender	820043	1	2	1.4891	0.49988	5004	1	2	1.4838	0.49979
	Private school	820043	1	2	1.2215	0.41527	5004	1	2	1.3345	0.47187
	Rural school	820043	1	2	1.0693	0.25397	5004	1	2	1.0604	0.23816
	Support for math learning	743377	-3.08	1.94	-0.0475	0.8883	4568	-3.08	1.94	-0.038	0.88076
	Socioeconomic status	764734	-2.33	2.95	0.5668	0.80064	4689	-2.33	2.95	0.6509	0.79913
	Indigenous	622758	1	2	1.059	0.23559	3893	1	2	1.0529	0.22389
	Immigrant	701712	1	2	1.0144	0.119	4339	1	2	1.0122	0.10986
	Math self-efficacy	683401	3.25	13	10.1605	2.0902	4229	3.25	13	10.1835	2.06457
	Teachers' ICT skills	798792	1	4	1.8697	0.82274	4878	1	4	1.8571	0.80919
	School socioeconomic area	799092	1	4	1.9888	0.67146	4898	1	4	2.0329	0.6604
	Access to computers in school	792864	1	4	2.1279	1.01926	4860	1	4	2.1498	1.0439
	Access to internet in school	803472	1	4	2.0173	1.02047	4906	1	4	2.0866	1.04926
	Access to learning software in school	795763	1	4	1.908	0.83529	4867	1	4	1.9653	0.86811
	Access to computers laboratory in school	791575	1	2	1.7281	0.44496	4822	1	2	1.6518	0.47645
	Access to internet at home	546390	1	2	1.7581	0.42825	3438	1	2	1.7917	0.40612
	Parental expectations of learning achivement	645243	1	6	4.4597	1.33527	3960	1	6	4.5321	1.28625
	Own computer at home	642596	1	2	1.5528	0.4972	3947	1	2	1.5923	0.49146
	To do homework	353577	1	4	2.0341	0.90584	2311	1	4	2.026	0.88773
	To play games	334779	1	4	2.1316	1.14534	2201	1	4	2.1118	1.14584
	To write emails or chat	320174	1	4	1.3072	0.80909	2113	1	4	1.3	0.79825
	To browsing on social media	323378	1	4	1.4172	0.922	2133	1	4	1.4041	0.90642
	To search for information	347120	1	4	2.4276	0.98365	2289	1	4	2.4225	0.97128
	To watch videos or listening music	341570	1	4	2.4495	1.2099	2248	1	4	2.4355	1.20794
	Valid N (listwise)	210904					1441
Brasil	Mathematics plausible value 1	3123877	358.5	1106.6	731.382	105.346	4349	358.5	1106.6	737.855	106.024
	Mathematics plausible value 2	3123877	361.9	1087.8	733.199	105.125	4349	361.9	1087.8	739.255	105.376
	Mathematics plausible value 3	3123877	448.1	1122.9	733.442	104.19	4349	448.1	1122.9	739.487	104.83
	Mathematics plausible value 4	3123877	452.3	1118.9	734.026	103.406	4349	452.3	1118.9	740.038	104.375
	Mathematics plausible value 5	3123877	377.6	1099.2	732.872	103.748	4349	377.6	1099.2	739.157	104.066
	Own computer/table in class	2822746	1	2	1.1494	0.35649	3945	1	2	1.1556	0.36256
	Gender	3123033	1	2	1.5137	0.49981	4348	1	2	1.5133	0.49988
	Private school	3123877	1	2	1.1372	0.3441	4349	1	2	1.1653	0.37152
	Rural school	3123877	1	2	1.1277	0.33376	4349	1	2	1.0853	0.27937
	Support for math learning	2898573	-3.08	1.94	-0.3026	0.89433	4039	-3.08	1.94	-0.2887	0.90407
	Socioeconomic status	2983339	-2.16	2.82	0.3244	0.79617	4145	-2.16	2.82	0.376	0.79531
	Indigenous	2792636	1	2	1.0604	0.2383	3899	1	2	1.0605	0.23849
	Immigrant	2743252	1	2	1.0029	0.05332	3826	1	2	1.0031	0.05592
	Math self-efficacy	2708827	3.25	13	9.0641	2.27758	3776	3.25	13	9.0624	2.28402
	Teachers' ICT skills	3066996	1	4	1.5802	0.73508	4279	1	4	1.6011	0.75368
	School socioeconomic area	3123877	1	4	1.8287	0.81364	4349	1	4	1.8519	0.8179
	Access to computers in school	3107240	1	4	1.9749	1.05408	4329	1	4	2.0467	1.08197
	Access to internet in school	3110791	1	4	2.1632	0.99906	4323	1	4	2.2392	1.01135
	Access to learning software in school	3123877	1	4	1.8254	0.86596	4349	1	4	1.9009	0.90031
	Access to computers laboratory in school	3123877	1	2	1.2244	0.41721	4349	1	2	1.2366	0.42505
	Access to internet at home	2272585	1	2	1.7967	0.40245	3175	1	2	1.8123	0.39055
	Parental expectations of learning achivement	2580212	1	5	4.2205	1.13693	3577	1	5	4.2695	1.11179
	Own computer at home	2557954	1	2	1.4205	0.49364	3552	1	2	1.4431	0.49683
	To do homework	1187736	1	4	2.0229	0.9421	1720	1	4	2.0331	0.94377
	To play games	1129372	1	4	2.0684	1.19295	1640	1	4	2.0732	1.19006
	To write emails or chat	1102360	1	4	1.6044	1.01739	1600	1	4	1.6038	1.01913
	To browsing on social media	1100723	1	4	1.8812	1.1817	1600	1	4	1.8756	1.18312
	To search for information	1139163	1	4	2.4544	1.05687	1655	1	4	2.4659	1.05983
	To watch videos or listening music	1132293	1	4	2.5755	1.22718	1644	1	4	2.5773	1.22839
	Valid N (listwise)	808659					1185
Colombia	Mathematics plausible value 1	847931	384.1	1088.2	706.229	86.6854	4467	384.1	1088.2	715.178	91.1259
	Mathematics plausible value 2	847931	393.6	1060.2	707.278	88.1997	4467	393.6	1060.2	716.241	92.9281
	Mathematics plausible value 3	847931	425.1	1112.2	706.979	85.9852	4467	425.1	1112.2	715.708	90.8518
	Mathematics plausible value 4	847931	387.4	1102.7	707.003	87.1156	4467	387.4	1102.7	715.736	91.2859
	Mathematics plausible value 5	847931	387.5	1105.4	706.554	86.492	4467	387.5	1105.4	715.739	91.365
	Own computer/table in class	787320	1	2	1.2552	0.43599	4167	1	2	1.2681	0.443
	Gender	847931	1	2	1.5073	0.49995	4467	1	2	1.5048	0.50003
	Private school	847931	1	2	1.1567	0.3635	4467	1	2	1.2154	0.41112
	Rural school	847931	1	2	1.2139	0.41008	4467	1	2	1.1954	0.39658
	Support for math learning	823423	-3.08	1.94	-0.2394	0.91088	4338	-3.08	1.94	-0.2529	0.91451
	Socioeconomic status	845780	-2.68	3.07	0.0368	0.99698	4453	-2.68	3.07	0.1882	1.0306
	Indigenous	754197	1	2	1.072	0.25852	4004	1	2	1.0612	0.23971
	Immigrant	788614	1	2	1.0162	0.12615	4151	1	2	1.0149	0.12131
	Math self-efficacy	762837	3.25	13	9.9164	2.09996	4051	3.25	13	9.9349	2.09329
	Teachers' ICT skills	775953	1	3	1.6973	0.69166	4057	1	3	1.7291	0.69644
	School socioeconomic area	789308	1	4	1.5902	0.69205	4130	1	4	1.6792	0.74243
	Access to computers in school	775957	1	4	1.9389	0.91824	4074	1	4	2.0471	0.95529
	Access to internet in school	775957	1	4	1.8903	0.97634	4074	1	4	2.0344	1.02188
	Access to learning software in school	770602	1	4	1.8365	0.85685	4033	1	4	1.9683	0.90138
	Access to computers laboratory in school	751433	1	2	1.2145	0.41049	3927	1	2	1.2801	0.44911
	Access to internet at home	647128	1	2	1.5455	0.49793	3495	1	2	1.6077	0.48833
	Parental expectations of learning achivement	809505	1	6	4.6367	1.37134	4265	1	6	4.74	1.3463
	Own computer at home	803463	1	2	1.4196	0.49349	4229	1	2	1.4784	0.49959
	To do homework	383220	1	4	2.67	1.05291	2236	1	4	2.7393	1.03776
	To play games	333214	1	4	1.9078	0.98564	1987	1	4	1.9134	0.9927
	To write emails or chat	328477	1	4	1.4779	0.86414	1958	1	4	1.4949	0.86771
	To browsing on social media	327148	1	4	1.4938	0.91181	1954	1	4	1.4811	0.89768
	To search for information	341591	1	4	2.7074	1.04278	2030	1	4	2.7562	1.01935
	To watch videos or listening music	337510	1	4	2.4104	1.11827	2010	1	4	2.4537	1.11378
	Valid N (listwise)	196575					1222
Costa Rica	Mathematics plausible value 1	67429	467.8	1052.8	724.775	80.3592	3699	467.8	1052.8	726.75	79.0399
	Mathematics plausible value 2	67429	468.7	1036.2	726.494	80.5751	3699	468.7	1036.2	728.017	79.0129
	Mathematics plausible value 3	67429	448.9	1001.6	726.879	80.1425	3699	448.9	1001.6	728.641	78.9103
	Mathematics plausible value 4	67429	445	1011	725.048	80.1339	3699	445	1011	726.767	78.7146
	Mathematics plausible value 5	67429	454.9	1025.2	726.785	80.3015	3699	454.9	1025.2	728.255	78.9326
	Own computer/table in class	63475	1	2	1.3478	0.47629	3497	1	2	1.336	0.47241
	Gender	67429	1	2	1.4977	0.5	3699	1	2	1.4945	0.50004
	Private school	67429	1	3	1.136	0.37781	3699	1	3	1.1395	0.40482
	Rural school	67429	1	2	1.2713	0.44465	3699	1	2	1.2084	0.40624
	Support for math learning	65717	-3.08	1.94	0.1715	0.92975	3607	-3.08	1.94	0.172	0.93273
	Socioeconomic status	66994	-2.68	2.79	0.3359	0.89432	3678	-2.68	2.79	0.3843	0.86348
	Indigenous	62195	1	2	1.0358	0.18576	3423	1	2	1.0298	0.17006
	Immigrant	62177	1	2	1.037	0.18873	3430	1	2	1.035	0.18377
	Math self-efficacy	62309	3.25	13	10.3634	2.11452	3439	3.25	13	10.3443	2.1242
	Teachers' ICT skills	64140	1	4	1.8413	0.85047	3507	1	4	1.8158	0.84392
	School socioeconomic area	65952	1	4	1.757	0.77269	3614	1	4	1.7803	0.74244
	Access to computers in school	64770	1	4	2.3966	1.16886	3553	1	4	2.3484	1.15819
	Access to internet in school	64891	1	4	2.3709	1.09253	3554	1	4	2.435	1.10056
	Access to learning software in school	65162	1	4	2.1287	1.06915	3583	1	4	2.1594	1.08772
	Access to computers laboratory in school	63114	1	2	1.3929	0.4884	3470	1	2	1.4003	0.49003
	Access to internet at home	56020	1	2	1.7436	0.43666	3089	1	2	1.7566	0.42923
	Parental expectations of learning achivement	64391	1	6	5.0147	1.3627	3542	1	6	5.0508	1.33267
	Own computer at home	64362	1	2	1.568	0.49536	3530	1	2	1.5669	0.49558
	To do homework	35673	1	4	2.0071	0.84562	1943	1	4	1.9913	0.83403
	To play games	32440	1	4	1.7649	0.99919	1787	1	4	1.7532	0.99724
	To write emails or chat	31663	1	4	1.2636	0.70922	1749	1	4	1.2573	0.69413
	To browsing on social media	31689	1	4	1.313	0.78211	1746	1	4	1.3064	0.77758
	To search for information	33962	1	4	2.2932	0.94236	1870	1	4	2.2904	0.94053
	To watch videos or listening music	33395	1	4	2.1162	1.10909	1832	1	4	2.0999	1.11411
	Valid N (listwise)	21619					1219
Cuba	Mathematics plausible value 1	100032	366.9	1050.3	689.676	114.528	5126	366.9	1050.3	680.059	113.407
	Mathematics plausible value 2	100032	385.5	1079.3	689.266	114.555	5126	385.5	1079.3	679.777	113.332
	Mathematics plausible value 3	100032	345.6	1064.7	688.565	114.783	5126	345.6	1064.7	679.331	114.111
	Mathematics plausible value 4	100032	385.9	1106.8	689.336	114.317	5126	385.9	1106.8	680.184	112.579
	Mathematics plausible value 5	100032	352.6	1117.8	688.23	113.573	5126	352.6	1117.8	679.199	112.362
	Own computer/table in class	95802	1	2	1.309	0.46209	4917	1	2	1.2862	0.45201
	Gender	99580	1	2	1.5111	0.49988	5100	1	2	1.5171	0.49976
	Private school	100032	1	1	1	0	5126	1	1	1	0
	Rural school	100032	1	2	1.2058	0.4043	5126	1	2	1.078	0.26825
	Support for math learning	98814	-3.08	1.94	0.5949	1.02657	5057	-3.08	1.94	0.5515	1.02515
	Socioeconomic status	99996	-2.17	2.79	0.1275	0.72196	5124	-2.17	2.79	0.2087	0.71113
	Indigenous	0					0
	Immigrant	96874	1	2	1.0012	0.03515	4971	1	2	1.0016	0.04009
	Math self-efficacy	91375	3.25	13	11.1971	1.84094	4709	3.25	13	11.0983	1.87647
	Teachers' ICT skills	97786	1	4	2.648	0.84902	5013	1	4	2.6786	0.82427
	School socioeconomic area	99482	1	4	2.5998	0.69626	5111	1	4	2.6449	0.69447
	Access to computers in school	98807	1	4	2.6502	0.94702	5036	1	4	2.6048	0.95558
	Access to internet in school	97860	1	4	2.2557	1.04336	5046	1	4	2.3314	1.06424
	Access to learning software in school	97787	1	4	3.1258	0.87353	5031	1	4	3.1431	0.87544
	Access to computers laboratory in school	100032	1	2	1.9859	0.11798	5126	1	2	1.9924	0.0869
	Access to internet at home	53423	1	2	1.251	0.43358	2713	1	2	1.2694	0.44375
	Parental expectations of learning achivement	97736	1	6	4.7239	0.79296	5013	1	6	4.7068	0.7934
	Own computer at home	93508	1	2	1.3862	0.48689	4815	1	2	1.4214	0.49383
	To do homework	34956	1	4	2.3455	1.0453	1936	1	4	2.3518	1.02007
	To play games	32827	1	4	2.3829	1.11245	1798	1	4	2.3999	1.10784
	To write emails or chat	26465	1	4	1.2342	0.69014	1464	1	4	1.2193	0.66172
	To browsing on social media	26629	1	4	1.2184	0.66072	1474	1	4	1.2103	0.6471
	To search for information	27459	1	4	1.5366	0.91588	1520	1	4	1.5421	0.9134
	To watch videos or listening music	32045	1	4	2.4382	1.08354	1773	1	4	2.4625	1.07473
	Valid N (listwise)	0					0
Dominican Republic	Mathematics plausible value 1	158845	386	923.4	634.925	70.5966	4899	386	923.4	634.631	70.0414
	Mathematics plausible value 2	158845	387	929.8	636.978	70.3774	4899	387	929.8	636.775	69.9828
	Mathematics plausible value 3	158845	409.5	938.2	636.381	69.9854	4899	409.5	938.2	636.447	69.4577
	Mathematics plausible value 4	158845	404.5	934.9	635.446	70.5618	4899	404.5	934.9	635.442	70.0573
	Mathematics plausible value 5	158845	382.9	926.9	635.693	70.7647	4899	382.9	926.9	635.34	70.2114
	Own computer/table in class	125995	1	2	1.296	0.4565	3888	1	2	1.2989	0.45782
	Gender	158319	1	2	1.5043	0.49998	4884	1	2	1.5035	0.50004
	Private school	158845	1	3	1.1873	0.42594	4899	1	3	1.1709	0.42627
	Rural school	158845	1	2	1.205	0.4037	4899	1	2	1.1421	0.34916
	Support for math learning	148799	-3.08	1.94	-0.0164	0.98114	4591	-3.08	1.94	-0.0087	0.97937
	Socioeconomic status	158158	-2.68	2.59	0.0512	0.80478	4876	-2.68	2.59	0.0731	0.78037
	Indigenous	0					0
	Immigrant	146340	1	2	1.0116	0.10715	4514	1	2	1.0109	0.10363
	Math self-efficacy	118884	3.25	13	10.1593	2.33364	3660	3.25	13	10.1448	2.32644
	Teachers' ICT skills	153104	1	4	1.8319	0.83773	4695	1	4	1.8038	0.82854
	School socioeconomic area	156142	1	4	1.7231	0.68022	4792	1	4	1.7281	0.67466
	Access to computers in school	155049	1	4	1.878	1.10715	4741	1	4	1.8502	1.07245
	Access to internet in school	152201	1	4	2.0743	1.09253	4634	1	4	2.0322	1.08123
	Access to learning software in school	152863	1	4	1.6698	0.90142	4689	1	4	1.6647	0.88563
	Access to computers laboratory in school	151712	1	2	1.1807	0.38474	4631	1	2	1.1747	0.37974
	Access to internet at home	110032	1	2	1.6593	0.47395	3345	1	2	1.6697	0.47041
	Parental expectations of learning achivement	148299	1	6	4.9743	1.3929	4559	1	6	4.9965	1.39074
	Own computer at home	146068	1	2	1.343	0.47471	4487	1	2	1.3499	0.47699
	To do homework	60067	1	4	2.4968	1.07095	1868	1	4	2.5123	1.07429
	To play games	41435	1	4	2.101	1.04731	1292	1	4	2.0882	1.04653
	To write emails or chat	39123	1	4	1.3885	0.79695	1209	1	4	1.402	0.80388
	To browsing on social media	39889	1	4	1.5263	0.90932	1241	1	4	1.552	0.92584
	To search for information	44778	1	4	2.6567	1.05568	1403	1	4	2.6657	1.05357
	To watch videos or listening music	42111	1	4	2.271	1.09431	1316	1	4	2.2667	1.09939
	Valid N (listwise)	0					0
Ecuador	Mathematics plausible value 1	292011	311.5	1081.2	719.618	94.8975	6758	311.5	1081.2	722.233	95.6816
	Mathematics plausible value 2	292011	400.7	1054.8	719.641	95.7528	6758	400.7	1054.8	721.963	96.2695
	Mathematics plausible value 3	292011	395.1	1055	720.753	94.145	6758	395.1	1055	723.195	94.782
	Mathematics plausible value 4	292011	361.1	1122	718.856	94.7537	6758	361.1	1122	721.408	95.2221
	Mathematics plausible value 5	292011	339.3	1083.6	720.164	94.8669	6758	339.3	1083.6	722.62	95.1151
	Own computer/table in class	272124	1	2	1.1735	0.37866	6287	1	2	1.1764	0.38119
	Gender	292011	1	2	1.5045	0.49998	6758	1	2	1.4969	0.50003
	Private school	292011	1	3	1.2718	0.53977	6758	1	3	1.307	0.58872
	Rural school	292011	1	2	1.2599	0.43855	6758	1	2	1.2141	0.41024
	Support for math learning	284181	-3.08	1.94	0.0221	1.01161	6567	-3.08	1.94	0.0436	1.00557
	Socioeconomic status	288753	-2.68	2.97	0.0792	0.9332	6677	-2.68	2.97	0.1371	0.90661
	Indigenous	244663	1	2	1.2707	0.44432	5627	1	2	1.2628	0.44022
	Immigrant	253823	1	2	1.0192	0.1374	5843	1	2	1.0192	0.13713
	Math self-efficacy	264066	3.25	13	9.9831	2.21266	6103	3.25	13	10.0077	2.21344
	Teachers' ICT skills	276614	1	4	2.2423	0.88376	6369	1	4	2.1953	0.88672
	School socioeconomic area	288052	1	3	1.9021	0.61342	6652	1	3	1.9112	0.61242
	Access to computers in school	283670	1	4	2.0804	1.0978	6544	1	4	2.1019	1.08602
	Access to internet in school	284877	1	4	2.1991	1.0427	6567	1	4	2.2106	1.0142
	Access to learning software in school	284429	1	4	1.859	0.93525	6576	1	4	1.8393	0.9018
	Access to computers laboratory in school	281630	1	2	1.1894	0.39181	6500	1	2	1.1874	0.39025
	Access to internet at home	211496	1	2	1.6622	0.47297	4904	1	2	1.6852	0.4645
	Parental expectations of learning achivement	271654	1	6	4.8142	1.47158	6274	1	6	4.8763	1.43492
	Own computer at home	267450	1	2	1.4861	0.49981	6192	1	2	1.5042	0.50002
	To do homework	147875	1	4	2.5489	0.9979	3502	1	4	2.5905	0.98992
	To play games	125278	1	4	1.8547	0.91383	2957	1	4	1.8593	0.9103
	To write emails or chat	120569	1	4	1.3843	0.74877	2846	1	4	1.3956	0.75518
	To browsing on social media	122409	1	4	1.4734	0.82295	2890	1	4	1.4806	0.82397
	To search for information	135083	1	4	2.6309	0.99676	3201	1	4	2.666	0.98298
	To watch videos or listening music	129149	1	4	2.2752	1.05334	3054	1	4	2.294	1.04938
	Valid N (listwise)	68856					1624
Argentina	Mathematics plausible value 1	307831	357.8	981.4	655.073	84.0809	4895	357.8	981.4	661.587	82.8266
	Mathematics plausible value 2	307831	363.2	970.9	657.797	83.1671	4895	363.2	970.9	664.068	82.344
	Mathematics plausible value 3	307831	336	969.9	657.711	82.9326	4895	336	969.9	664.019	81.8914
	Mathematics plausible value 4	307831	372.1	976.3	657.198	82.3943	4895	372.1	976.3	663.31	81.4393
	Mathematics plausible value 5	307831	358.1	971.3	658.634	83.0035	4895	358.1	971.3	664.681	82.0634
	Own computer/table in class	270519	1	2	1.1907	0.39286	4319	1	2	1.2063	0.40469
	Gender	307831	1	2	1.5074	0.49995	4895	1	2	1.5091	0.49997
	Private school	307831	1	2	1.151	0.35803	4895	1	2	1.1504	0.35746
	Rural school	307831	1	2	1.6779	0.46728	4895	1	2	1.6037	0.48918
	Support for math learning	292764	-3.08	1.94	-0.072	1.02226	4659	-3.08	1.94	-0.036	1.00181
	Socioeconomic status	303891	-2.68	2.95	-0.4693	1.07882	4831	-2.68	2.95	-0.3827	1.06452
	Indigenous	208262	1	2	1.6826	0.46547	3295	1	2	1.6595	0.47395
	Immigrant	262830	1	2	1.0113	0.1055	4195	1	2	1.0129	0.11274
	Math self-efficacy	263680	3.25	13	10.4372	2.11697	4219	3.25	13	10.4201	2.09424
	Teachers' ICT skills	293753	1	4	2.0449	0.9476	4702	1	4	1.9815	0.94694
	School socioeconomic area	304731	1	4	1.7326	0.6888	4866	1	4	1.7789	0.68339
	Access to computers in school	269707	1	4	1.9696	1.24592	4405	1	4	1.9037	1.21742
	Access to internet in school	271082	1	4	1.9429	1.24862	4390	1	4	1.8585	1.20047
	Access to learning software in school	290581	1	4	1.7863	1.15482	4675	1	4	1.7551	1.12014
	Access to computers laboratory in school	296967	1	2	1.2223	0.41577	4717	1	2	1.2483	0.43204
	Access to internet at home	206106	1	2	1.348	0.47635	3300	1	2	1.3673	0.48213
	Parental expectations of learning achivement	294038	1	6	3.6198	1.84172	4676	1	6	3.7301	1.81021
	Own computer at home	286730	1	2	1.3063	0.46095	4558	1	2	1.3219	0.46724
	To do homework	137609	1	4	2.1866	1.07774	2197	1	4	2.2153	1.07233
	To play games	113555	1	4	1.7139	0.96213	1806	1	4	1.7165	0.95344
	To write emails or chat	110476	1	4	1.435	0.84686	1761	1	4	1.4333	0.84491
	To browsing on social media	110336	1	4	1.4821	0.93332	1753	1	4	1.4797	0.92638
	To search for information	114726	1	4	2.2402	1.09738	1828	1	4	2.2949	1.09586
	To watch videos or listening music	112969	1	4	2.0332	1.12305	1804	1	4	2.0671	1.13261
	Valid N (listwise)	45128					745
Guatemala	Mathematics plausible value 1	184823	402.6	993.9	680.754	88.0833	4423	402.6	993.9	678.716	82.9827
	Mathematics plausible value 2	184823	412.6	1051.5	682.227	88.2765	4423	412.6	1051.5	680.089	83.0161
	Mathematics plausible value 3	184823	349.3	1049.8	683.734	89.4415	4423	349.3	1049.8	680.819	83.3299
	Mathematics plausible value 4	184823	397.2	1074.4	682.676	88.1478	4423	397.2	1074.4	679.586	82.8374
	Mathematics plausible value 5	184823	414.1	1050.1	682.406	88.7724	4423	414.1	1050.1	679.921	82.7804
	Own computer/table in class	149979	1	2	1.1845	0.38787	3628	1	2	1.1965	0.39743
	Gender	184707	1	2	1.4996	0.5	4422	1	2	1.502	0.50005
	Private school	184823	1	2	1.1325	0.33903	4423	1	2	1.1115	0.31474
	Rural school	184823	1	2	1.3853	0.48667	4423	1	2	1.5474	0.49781
	Support for math learning	169358	-3.08	1.94	0.1022	1.16504	4082	-3.08	1.94	0.116	1.13357
	Socioeconomic status	178900	-2.68	2.94	-0.5229	0.99195	4281	-2.68	2.94	-0.3651	0.94993
	Indigenous	108255	1	2	1.2653	0.44147	2634	1	2	1.2354	0.42432
	Immigrant	153714	1	2	1.0038	0.0615	3679	1	2	1.0052	0.07169
	Math self-efficacy	143961	3.25	13	10.414	2.35196	3454	3.25	13	10.4133	2.32941
	Teachers' ICT skills	172966	1	4	1.9149	0.97484	4169	1	4	1.8599	0.94272
	School socioeconomic area	182801	1	4	1.5315	0.61518	4375	1	4	1.5803	0.66107
	Access to computers in school	177385	1	4	1.5239	0.97325	4288	1	4	1.5793	1.00047
	Access to internet in school	175424	1	4	1.5779	1.00558	4243	1	4	1.6653	1.0464
	Access to learning software in school	177218	1	4	1.4712	0.90883	4248	1	4	1.5174	0.93926
	Access to computers laboratory in school	177371	1	2	1.1852	0.38848	4203	1	2	1.2144	0.41043
	Access to internet at home	96659	1	2	1.3999	0.48988	2317	1	2	1.4519	0.49779
	Parental expectations of learning achivement	157262	1	6	3.6677	1.75581	3751	1	6	3.8854	1.70166
	Own computer at home	149962	1	2	1.2174	0.41249	3589	1	2	1.2516	0.43399
	To do homework	58453	1	4	2.0599	1.11961	1452	1	4	2.1233	1.12148
	To play games	40691	1	4	1.8278	1.05856	1044	1	4	1.8659	1.06059
	To write emails or chat	38842	1	4	1.3552	0.8446	992	1	4	1.4022	0.88405
	To browsing on social media	38838	1	4	1.4312	0.92434	994	1	4	1.4688	0.956
	To search for information	43179	1	4	2.2243	1.14439	1095	1	4	2.3479	1.14826
	To watch videos or listening music	41491	1	4	1.9818	1.16038	1047	1	4	2.0898	1.18852
	Valid N (listwise)	13046					357
Mexico	Mathematics plausible value 1	2291802	417.1	1072.3	757.82	99.6631	4824	417.1	1072.3	760.674	98.6211
	Mathematics plausible value 2	2291802	416.3	1067.2	757.655	99.1538	4824	416.3	1067.2	760.75	98.1267
	Mathematics plausible value 3	2291802	408.1	1073.9	758.684	98.8156	4824	408.1	1073.9	761.602	97.8693
	Mathematics plausible value 4	2291802	418.3	1073.2	757.595	98.7745	4824	418.3	1073.2	760.607	97.7599
	Mathematics plausible value 5	2291802	385	1054.4	757.972	98.8778	4824	385	1054.4	760.721	97.9467
	Own computer/table in class	2140259	1	2	1.1469	0.35396	4496	1	2	1.1524	0.35941
	Gender	2291802	1	2	1.5013	0.5	4824	1	2	1.4975	0.50005
	Private school	2291802	1	2	1.0878	0.28306	4824	1	2	1.0873	0.28226
	Rural school	2291802	1	2	1.2134	0.40971	4824	1	2	1.1468	0.35391
	Support for math learning	2169374	-3.08	1.94	-0.1455	1.01267	4554	-3.08	1.94	-0.1443	1.00879
	Socioeconomic status	2184121	-2.68	3.31	0.0441	0.88876	4583	-2.68	3.31	0.1211	0.87565
	Indigenous	2006225	1	2	1.0969	0.29584	4227	1	2	1.084	0.2774
	Immigrant	1968840	1	2	1.0327	0.17776	4145	1	2	1.0309	0.17302
	Math self-efficacy	2108786	3.25	13	9.5641	2.19105	4442	3.25	13	9.5515	2.18581
	Teachers' ICT skills	2259171	1	4	2.4681	0.82754	4749	1	4	2.471	0.80897
	School socioeconomic area	2291802	1	4	1.806	0.60737	4824	1	4	1.8236	0.58965
	Access to computers in school	2280059	1	4	1.5318	0.88355	4794	1	4	1.4956	0.85043
	Access to internet in school	2269413	1	4	1.7119	0.93145	4776	1	4	1.7203	0.91254
	Access to learning software in school	2280059	1	4	1.4424	0.75394	4794	1	4	1.4289	0.7234
	Access to computers laboratory in school	2271107	1	2	1.3489	0.47663	4776	1	2	1.358	0.47947
	Access to internet at home	1683486	1	2	1.5144	0.49979	3570	1	2	1.5513	0.49744
	Parental expectations of learning achivement	2011044	1	6	4.2441	1.45859	4212	1	6	4.3262	1.4264
	Own computer at home	1980842	1	2	1.3499	0.47693	4151	1	2	1.3734	0.48377
	To do homework	778830	1	4	2.161	0.89363	1696	1	4	2.1904	0.89294
	To play games	739970	1	4	1.6693	0.95599	1608	1	4	1.6884	0.96255
	To write emails or chat	730621	1	4	1.3701	0.79331	1588	1	4	1.3804	0.79865
	To browsing on social media	729873	1	4	1.4606	0.88856	1589	1	4	1.489	0.90863
	To search for information	758732	1	4	2.3699	0.93023	1656	1	4	2.4118	0.91814
	To watch videos or listening music	748587	1	4	2.1655	1.11612	1628	1	4	2.1984	1.1189
	Valid N (listwise)	527355					1161
Nicaragua	Mathematics plausible value 1	58864	428.7	947.9	662.412	64.6777	4868	428.7	947.9	666.674	64.6287
	Mathematics plausible value 2	58864	446.2	913.8	663.727	65.1179	4868	446.2	913.8	667.332	64.2076
	Mathematics plausible value 3	58864	424.2	905.9	664.09	64.0118	4868	424.2	905.9	667.751	63.2001
	Mathematics plausible value 4	58864	415.6	919.6	663.318	64.1313	4868	415.6	919.6	667.242	63.8779
	Mathematics plausible value 5	58864	439.2	924	662.554	63.821	4868	439.2	924	667.173	63.9523
	Own computer/table in class	45726	1	2	1.2	0.40001	3855	1	2	1.2345	0.42374
	Gender	58864	1	2	1.4951	0.49998	4868	1	2	1.4858	0.49985
	Private school	58864	1	2	1.1438	0.35091	4868	1	2	1.1703	0.37593
	Rural school	58864	1	2	1.6268	0.48367	4868	1	2	1.4484	0.49739
	Support for math learning	53864	-3.08	1.94	-0.0453	0.99201	4450	-3.08	1.94	-0.0625	0.96851
	Socioeconomic status	56403	-2.68	2.64	-0.6423	0.93817	4623	-2.68	2.64	-0.4084	0.89695
	Indigenous	44059	1	2	1.1446	0.35167	3647	1	2	1.1371	0.344
	Immigrant	49968	1	2	1.008	0.08899	4045	1	2	1.0087	0.09263
	Math self-efficacy	44212	3.25	13	10.5625	2.1124	3742	3.25	13	10.5138	2.10803
	Teachers' ICT skills	54330	1	4	1.6257	0.82864	4494	1	4	1.7632	0.85832
	School socioeconomic area	57539	1	4	1.7383	0.68056	4793	1	4	1.7682	0.6824
	Access to computers in school	53122	1	4	2.188	1.21683	4481	1	4	2.2839	1.2009
	Access to internet in school	53741	1	4	2.0783	1.20949	4551	1	4	2.1863	1.2073
	Access to learning software in school	54126	1	4	1.854	1.07173	4548	1	4	2.0303	1.08672
	Access to computers laboratory in school	53938	1	2	1.2051	0.40376	4495	1	2	1.3186	0.46598
	Access to internet at home	31144	1	2	1.2999	0.45821	2554	1	2	1.3665	0.48194
	Parental expectations of learning achivement	53103	1	6	4.3863	1.59231	4324	1	6	4.574	1.5022
	Own computer at home	51598	1	2	1.1696	0.37527	4193	1	2	1.2101	0.40744
	To do homework	19615	1	4	1.8464	1.09421	1616	1	4	1.9926	1.10834
	To play games	13780	1	4	1.6545	0.9905	1198	1	4	1.7504	1.031
	To write emails or chat	13065	1	4	1.3524	0.81575	1133	1	4	1.4148	0.88121
	To browsing on social media	13045	1	4	1.4251	0.89554	1143	1	4	1.5188	0.97847
	To search for information	13889	1	4	1.943	1.11685	1227	1	4	2.1239	1.12917
	To watch videos or listening music	13627	1	4	1.8331	1.11211	1183	1	4	1.9569	1.14765
	Valid N (listwise)	4674					411
Panama	Mathematics plausible value 1	66555	351.5	953.6	643.523	75.5875	5632	351.5	953.6	649.227	76.6306
	Mathematics plausible value 2	66555	387.8	940.5	644.408	75.6553	5632	387.8	940.5	650.334	76.4456
	Mathematics plausible value 3	66555	348.4	949.9	646.257	74.5588	5632	348.4	949.9	651.515	75.3406
	Mathematics plausible value 4	66555	305	939.1	644.466	75.7888	5632	305	939.1	650.397	76.2333
	Mathematics plausible value 5	66555	394	940.6	644.412	74.7987	5632	394	940.6	650.303	75.5121
	Own computer/table in class	54939	1	2	1.2845	0.45118	4650	1	2	1.2951	0.45612
	Gender	66345	1	2	1.4878	0.49986	5624	1	2	1.4865	0.49986
	Private school	66555	1	2	1.1501	0.35719	5632	1	2	1.1804	0.38455
	Rural school	66555	1	2	1.4328	0.49546	5632	1	2	1.3398	0.4737
	Support for math learning	60447	-3.08	1.94	-0.1437	1.00054	5118	-3.08	1.94	-0.1086	0.99032
	Socioeconomic status	63598	-2.68	2.79	-0.1155	1.1796	5361	-2.68	2.79	0.0409	1.1393
	Indigenous	51930	1	2	1.2135	0.4098	4423	1	2	1.1888	0.39138
	Immigrant	55070	1	2	1.0653	0.24714	4671	1	2	1.0642	0.24518
	Math self-efficacy	53130	3.25	13	9.9193	2.37063	4527	3.25	13	9.9439	2.34671
	Teachers' ICT skills	59002	1	4	2.0952	0.86582	4943	1	4	2.1082	0.84791
	School socioeconomic area	60097	1	3	1.6777	0.70199	5056	1	3	1.7478	0.70598
	Access to computers in school	58638	1	4	2.409	1.09295	4976	1	4	2.4895	1.06469
	Access to internet in school	59337	1	4	2.3052	1.07463	5033	1	4	2.3517	1.04808
	Access to learning software in school	58878	1	4	2.0029	0.98128	4975	1	4	2.0621	0.97926
	Access to computers laboratory in school	55941	1	2	1.2095	0.40697	4715	1	2	1.2365	0.42496
	Access to internet at home	36247	1	2	1.5318	0.49899	3065	1	2	1.5964	0.4907
	Parental expectations of learning achivement	53785	1	6	4.6895	1.50854	4481	1	6	4.8362	1.43176
	Own computer at home	52736	1	2	1.4098	0.4918	4387	1	2	1.4541	0.49794
	To do homework	24231	1	4	2.3748	0.99343	2155	1	4	2.4339	0.97825
	To play games	18736	1	4	1.7187	0.95246	1698	1	4	1.7297	0.95722
	To write emails or chat	18156	1	4	1.2525	0.69077	1645	1	4	1.2669	0.70618
	To browsing on social media	18196	1	4	1.282	0.72537	1648	1	4	1.2925	0.73553
	To search for information	20550	1	4	2.4959	0.98211	1869	1	4	2.5538	0.97502
	To watch videos or listening music	19037	1	4	1.989	1.0492	1723	1	4	2.0232	1.06116
	Valid N (listwise)	9495					910
Peru	Mathematics plausible value 1	534576	444.3	1109.4	758.068	103.517	5938	444.3	1109.4	768.42	100.62
	Mathematics plausible value 2	534576	400	1133.8	760.119	104.682	5938	400	1133.8	770.183	101.802
	Mathematics plausible value 3	534576	402.4	1120.9	758.891	103.911	5938	402.4	1120.9	769.907	100.667
	Mathematics plausible value 4	534576	424.2	1105.3	760.751	101.959	5938	424.2	1105.3	770.231	99.3018
	Mathematics plausible value 5	534576	390.6	1123.2	758.697	103.665	5938	390.6	1123.2	769.407	100.277
	Own computer/table in class	510485	1	2	1.2397	0.42687	5697	1	2	1.2457	0.43056
	Gender	534576	1	2	1.5213	0.49955	5938	1	2	1.5069	0.49999
	Private school	534576	1	2	1.2514	0.4338	5938	1	2	1.24	0.42711
	Rural school	534576	1	2	1.1533	0.36029	5938	1	2	1.0527	0.22348
	Support for math learning	520474	-3.08	1.94	-0.0783	0.95019	5786	-3.08	1.94	-0.0196	0.9398
	Socioeconomic status	522147	-2.68	3.31	-0.2102	1.04135	5800	-2.68	3.31	-0.0834	0.98762
	Indigenous	460822	1	2	1.2181	0.41296	5177	1	2	1.185	0.38838
	Immigrant	488609	1	2	1.013	0.11309	5453	1	2	1.0147	0.12024
	Math self-efficacy	498908	3.25	13	10.309	2.05067	5589	3.25	13	10.3351	2.02445
	Teachers' ICT skills	528752	1	4	1.9464	0.85823	5879	1	4	1.9121	0.83329
	School socioeconomic area	526484	1	4	1.7806	0.65939	5846	1	4	1.8496	0.64409
	Access to computers in school	521233	1	4	1.8999	1.0189	5804	1	4	1.9354	1.03869
	Access to internet in school	519413	1	4	1.9834	1.00939	5780	1	4	2.0374	1.01229
	Access to learning software in school	517550	1	4	1.8841	0.89626	5767	1	4	1.9071	0.89843
	Access to computers laboratory in school	522847	1	2	1.2668	0.4423	5809	1	2	1.2808	0.44941
	Access to internet at home	401792	1	2	1.3971	0.48929	4431	1	2	1.4358	0.49592
	Parental expectations of learning achivement	468111	1	6	4.9036	1.41684	5184	1	6	4.9981	1.34039
	Own computer at home	460135	1	2	1.3869	0.48704	5105	1	2	1.4137	0.49255
	To do homework	238155	1	4	2.3641	1.01663	2638	1	4	2.4196	0.97959
	To play games	221747	1	4	1.869	0.92837	2473	1	4	1.8787	0.91809
	To write emails or chat	217552	1	4	1.3929	0.78468	2419	1	4	1.3989	0.77706
	To browsing on social media	216882	1	4	1.476	0.84181	2417	1	4	1.4932	0.84575
	To search for information	225663	1	4	2.4583	1.03756	2524	1	4	2.5487	1.00198
	To watch videos or listening music	222539	1	4	2.1776	1.07306	2482	1	4	2.2188	1.06314
	Valid N (listwise)	147781					1705
Paraguay	Mathematics plausible value 1	105751	300.3	982.1	646.058	86.1354	4849	300.3	982.1	650.901	85.6522
	Mathematics plausible value 2	105751	308.1	966.5	646.196	85.6643	4849	308.1	966.5	651.125	85.6466
	Mathematics plausible value 3	105751	350.9	964.6	648.783	86.0925	4849	350.9	964.6	653.342	85.6028
	Mathematics plausible value 4	105751	322.3	1001.9	647.261	85.8678	4849	322.3	1001.9	651.436	85.7138
	Mathematics plausible value 5	105751	340.3	1013.6	648.527	85.836	4849	340.3	1013.6	652.878	86.0542
	Own computer/table in class	91515	1	2	1.1591	0.36573	4229	1	2	1.1717	0.37714
	Gender	105751	1	2	1.4989	0.5	4849	1	2	1.4997	0.50005
	Private school	105751	1	3	1.3564	0.71394	4849	1	3	1.3951	0.73891
	Rural school	105751	1	2	1.3653	0.48152	4849	1	2	1.2464	0.43098
	Support for math learning	98773	-3.08	1.94	-0.0121	0.95496	4535	-3.08	1.94	-0.0043	0.93661
	Socioeconomic status	102351	-2.46	3.31	0.0336	0.91679	4691	-2.46	3.31	0.1628	0.89602
	Indigenous	79453	1	2	1.0674	0.25076	3724	1	2	1.0607	0.23879
	Immigrant	86917	1	2	1.0087	0.09294	3983	1	2	1.0085	0.09201
	Math self-efficacy	85715	3.25	13	10.1944	2.19389	3975	3.25	13	10.2019	2.19041
	Teachers' ICT skills	101833	1	4	1.9579	0.86028	4656	1	4	2.0425	0.85709
	School socioeconomic area	102891	1	4	1.8917	0.6374	4719	1	4	1.989	0.61757
	Access to computers in school	101898	1	4	1.8253	1.03819	4686	1	4	1.9315	1.04713
	Access to internet in school	102976	1	4	2.0457	1.04445	4716	1	4	2.2012	1.00793
	Access to learning software in school	104320	1	4	1.8024	0.95074	4776	1	4	1.8876	0.93413
	Access to computers laboratory in school	102562	1	2	1.1491	0.3562	4667	1	2	1.1843	0.38775
	Access to internet at home	61374	1	2	1.4382	0.49617	2868	1	2	1.4899	0.49998
	Parental expectations of learning achivement	89194	1	6	4.3435	1.42371	4056	1	6	4.4975	1.36812
	Own computer at home	87539	1	2	1.2947	0.45591	3987	1	2	1.3301	0.4703
	To do homework	23347	1	4	2.161	0.89755	1194	1	4	2.1616	0.8752
	To play games	21045	1	4	1.98	1.00972	1091	1	4	1.9578	1.01007
	To write emails or chat	19825	1	4	1.3018	0.75652	1036	1	4	1.3137	0.76962
	To browsing on social media	20037	1	4	1.3616	0.8115	1045	1	4	1.3732	0.83071
	To search for information	22044	1	4	2.4292	0.93334	1152	1	4	2.4601	0.92938
	To watch videos or listening music	21103	1	4	2.19	1.10225	1101	1	4	2.2225	1.10966
	Valid N (listwise)	9935					520
El Salvador	Mathematics plausible value 1	99394	369.4	949.5	675.175	76.4793	5920	369.4	949.5	675.956	76.2765
	Mathematics plausible value 2	99394	366.5	997.7	675.731	76.5103	5920	366.5	997.7	676.852	75.9146
	Mathematics plausible value 3	99394	375.1	969.6	676.47	75.7618	5920	375.1	969.6	677.168	75.3568
	Mathematics plausible value 4	99394	408.6	973.8	675.988	76.8007	5920	408.6	973.8	676.608	76.3892
	Mathematics plausible value 5	99394	384.6	991.5	676.133	75.9136	5920	384.6	991.5	677.425	75.2845
	Own computer/table in class	89947	1	2	1.2425	0.42858	5320	1	2	1.2398	0.42703
	Gender	99300	1	2	1.5126	0.49984	5912	1	2	1.5112	0.49992
	Private school	99394	1	2	1.1505	0.35754	5920	1	2	1.1417	0.3488
	Rural school	99394	1	2	1.49	0.4999	5920	1	2	1.4356	0.49588
	Support for math learning	94816	-3.08	1.94	0.0704	1.00834	5631	-3.08	1.94	0.0449	1.01003
	Socioeconomic status	98533	-2.68	3.24	-0.2766	0.99195	5852	-2.68	3.24	-0.2253	0.97695
	Indigenous	83555	1	2	1.1309	0.33726	4945	1	2	1.1319	0.33836
	Immigrant	88035	1	2	1.0043	0.06539	5212	1	2	1.0031	0.05533
	Math self-efficacy	86205	3.25	13	10.0531	2.12844	5133	3.25	13	10.0016	2.1483
	Teachers' ICT skills	96483	1	4	1.9032	0.91191	5731	1	4	1.8536	0.87212
	School socioeconomic area	97157	1	3	1.6726	0.60503	5813	1	3	1.6916	0.60338
	Access to computers in school	98129	1	4	2.2591	1.06898	5834	1	4	2.1925	1.05942
	Access to internet in school	97135	1	4	2.0114	1.11921	5805	1	4	2.0091	1.11414
	Access to learning software in school	97672	1	4	1.8534	0.96377	5798	1	4	1.8244	0.96168
	Access to computers laboratory in school	97411	1	2	1.2084	0.40618	5773	1	2	1.2016	0.40125
	Access to internet at home	62381	1	2	1.4582	0.49825	3644	1	2	1.4827	0.49977
	Parental expectations of learning achivement	91015	1	6	4.0336	1.29454	5401	1	6	4.0879	1.28519
	Own computer at home	88372	1	2	1.2961	0.45652	5234	1	2	1.3122	0.46343
	To do homework	31798	1	4	2.3275	1.00873	1927	1	4	2.3664	0.9941
	To play games	22712	1	4	1.7319	0.96355	1393	1	4	1.7322	0.96159
	To write emails or chat	21699	1	4	1.3304	0.77965	1323	1	4	1.3235	0.77574
	To browsing on social media	21870	1	4	1.3668	0.79497	1327	1	4	1.3632	0.7897
	To search for information	25279	1	4	2.5277	1.01201	1548	1	4	2.5504	1.00196
	To watch videos or listening music	23088	1	4	1.9223	1.06851	1405	1	4	1.9217	1.06464
	Valid N (listwise)	12223					746
Uruguay	Mathematics plausible value 1	49882	370.1	1110	759.193	105.535	5176	370.1	1110	760.211	104.906
	Mathematics plausible value 2	49882	334.4	1117.1	760.665	106.839	5176	334.4	1117.1	761.745	105.976
	Mathematics plausible value 3	49882	337.2	1110.8	759.658	104.865	5176	337.2	1110.8	761.209	104.261
	Mathematics plausible value 4	49882	250	1086.1	758.585	105.556	5176	250	1086.1	761.109	104.685
	Mathematics plausible value 5	49882	301.5	1111.3	759.278	107.234	5176	301.5	1111.3	761.252	105.642
	Own computer/table in class	44322	1	2	1.7671	0.42265	4609	1	2	1.7657	0.42362
	Gender	49882	1	2	1.4999	0.50001	5176	1	2	1.499	0.50005
	Private school	49882	1	2	1.1594	0.36601	5176	1	2	1.1634	0.36981
	Rural school	49882	1	2	1.0573	0.23237	5176	1	2	1.0093	0.09586
	Support for math learning	45756	-3.08	1.94	0.1092	0.89343	4753	-3.08	1.94	0.1275	0.87874
	Socioeconomic status	48098	-2.05	3.31	0.6582	0.86696	4988	-2.05	3.31	0.695	0.87232
	Indigenous	0					0
	Immigrant	43422	1	2	1.0082	0.09037	4519	1	2	1.0091	0.09483
	Math self-efficacy	42198	3.25	13	9.7118	2.33674	4379	3.25	13	9.7023	2.29369
	Teachers' ICT skills	46730	1	4	2.2873	0.81177	4901	1	4	2.2975	0.80664
	School socioeconomic area	48495	1	4	1.9817	0.80822	4993	1	4	2.0012	0.83229
	Access to computers in school	47977	1	4	2.9363	0.87825	4946	1	4	2.9464	0.87993
	Access to internet in school	47473	1	4	2.9764	0.80517	4875	1	4	3.0267	0.79938
	Access to learning software in school	47109	1	4	2.7298	0.86961	4878	1	4	2.7421	0.87284
	Access to computers laboratory in school	46969	1	2	1.2571	0.43706	4844	1	2	1.2766	0.44738
	Access to internet at home	36612	1	2	1.7444	0.43621	3815	1	2	1.7659	0.42348
	Parental expectations of learning achivement	41311	1	6	4.2105	1.47872	4256	1	6	4.254	1.46998
	Own computer at home	41015	1	2	1.8292	0.37638	4222	1	2	1.8354	0.37088
	To do homework	259	4	4	4	0	2	4	4	4	0
	To play games	259	4	4	4	0	2	4	4	4	0
	To write emails or chat	0					0
	To browsing on social media	0					0
	To search for information	0					0
	To watch videos or listening music	0					0
	Valid N (listwise)	0					0
